# Supplementary material
Source: PubMed Central journal article supplement (PMC6601269)
Supplement: pnas.1903819116.sapp.pdf [file pnas.1903819116.sapp.pdf]

---

## Functional Assembly of Nitrous Oxide Reductase provides Insights into Copper Site Maturation

Lin Zhang, Anja Wüst, Benedikt Prasser, Christoph Müller, and Oliver Einsle

---

### Supplementary Figures

**Figure S1:** SDS-PAGE analysis of recombinant accessory components for N<sub>2</sub>O reductase.

**Figure S2:** UV-vis absorption spectra of anoxically purified recombinant *PsNosZ*.

**Figure S3:** The overview of recombinant *PsNosZ* structure.

**Figure S4:** Anomalous difference Fourier electron density map for copper ions in Cu<sub>A</sub> and Cu<sub>Z</sub> sites.

**Figure S5:** Role of NosR and ApbE in the maturation of *PsNosZ*.

**Figure S6:** Role of NosDFY in the assembly of Cu<sub>Z</sub> site.

**Figure S7:** Role of *PsNosL* in the copper sites assembly of *PsNosZ*.

**Figure S8:** Production of *MhNosZ* and *MhNosL* to investigate Cu<sub>A</sub> maturation.

### Supplementary Tables

**Table S1:** Bacterial strains used in this study.

**Table S2:** Plasmids used in this study

**Table S3:** Primers used in this study

**Table S4:** Data collection and refinement statistics.

### Supplementary References

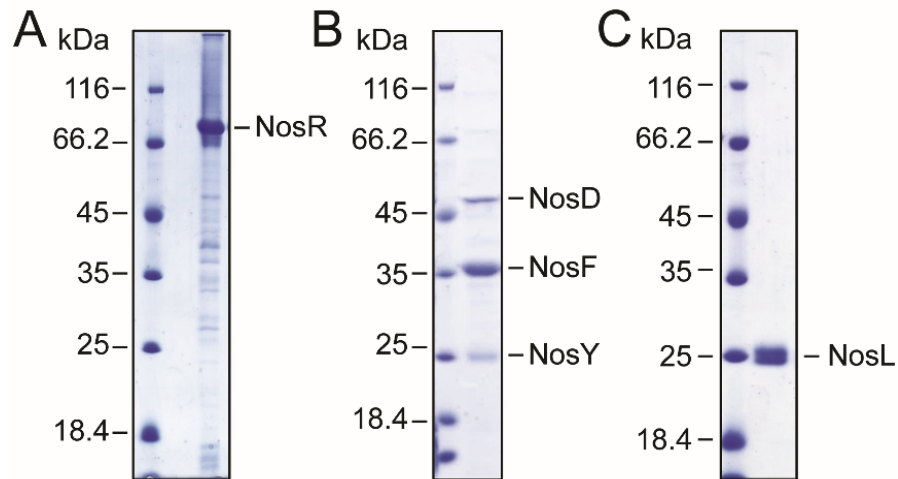

**Figure S1.** SDS-PAGE analysis of **A)** recombinant *PsNosR*, **B)** *PsNosDFY* and **C)** *PsNosL*. *PsNosR* and *PsNosF* were His-tagged at either C-terminus or N-terminus; *PsNosL* was Strep-tagged at the C-terminus. The molecular mass of *PsNosR*, *PsNosD*, *PsNosF*, *PsNosY* and *PsNosL* are 81.9 kDa, 48.2 kDa, 33.8 kDa, 29.4 kDa and 20.4 kDa, respectively. The identity of the individual subunits was confirmed by mass-spectrometric analysis.

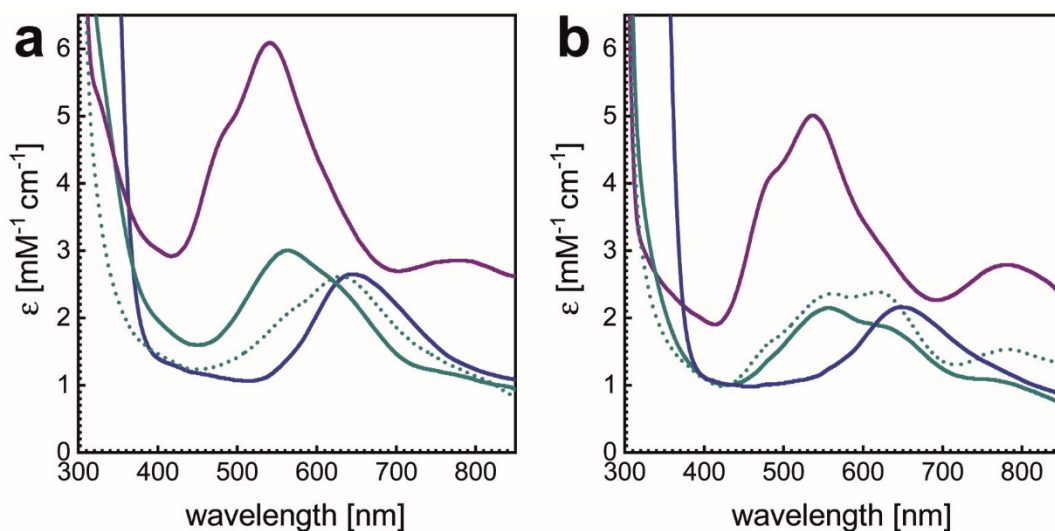

**Figure S2:** Electron excitation spectra of anoxically *vs.* oxically isolated rN<sub>2</sub>OR. **A)** anoxic isolation, **B)** oxic isolation protocol. The spectrum of the protein as isolated is shown in cyan (dotted) in both panels. Samples were oxidized with potassium ferricyanide (purple) to yield form I spectra with maxima at 538 nm and 795 nm. Addition of ascorbate led to selective reduction of Cu<sub>A</sub> (cyan), and further reduction by sodium dithionite yielded a blue form with a single charge-transfer band at 650 nm (blue). Beside a slightly elevated copper content in the anoxic preparation (A), both samples show nearly identical spectroscopic properties.

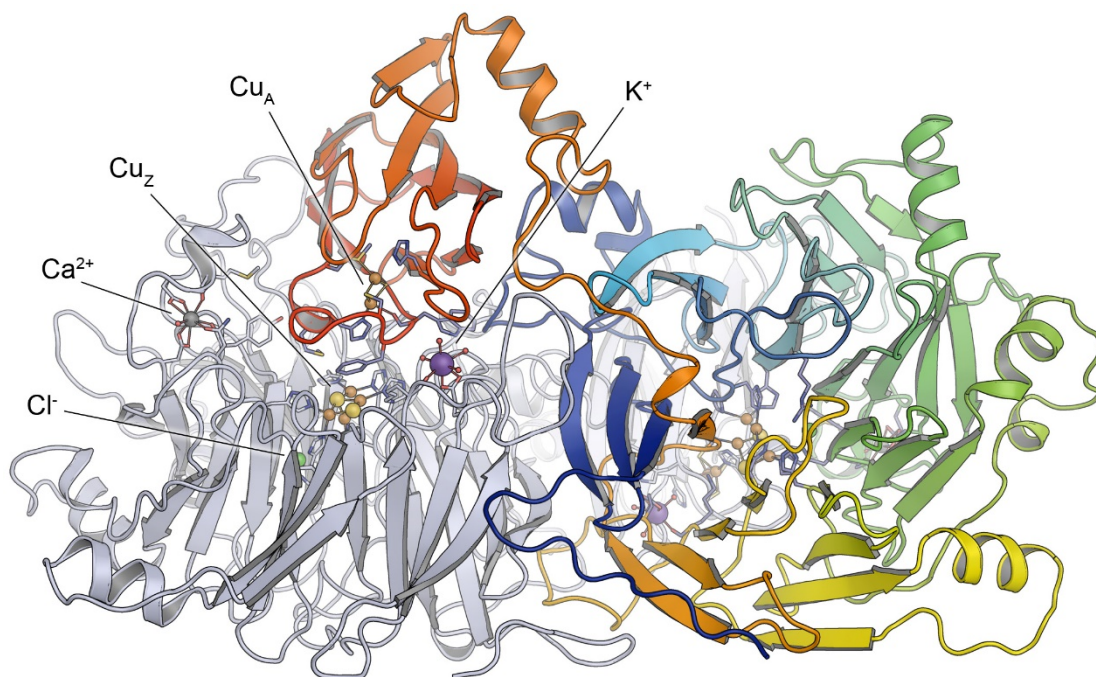

**Figure S3:** Three-dimensional structure of recombinant *PsNosZ*. With an overall root-mean-squared displacement of 0.2 Å, the dimeric structure of recombinant *PsNosZ* produced in *E. coli* is nearly identical to that of native protein isolated from *P. stutzeri* (PDB 3SBQ). The two peptide chains form a tight head-to-tail dimer that results in a close distance of 10 Å between the Cu<sub>A</sub> and Cu<sub>Z</sub> centers of different monomers. Monomer A is shown in grey cartoon, monomer B is colored from blue at the N-terminus to red at the C-terminus. The copper centers and metal ions are depicted as spheres, as are the calcium (grey), potassium (purple) and chloride ions (green) coordinated within each monomer.

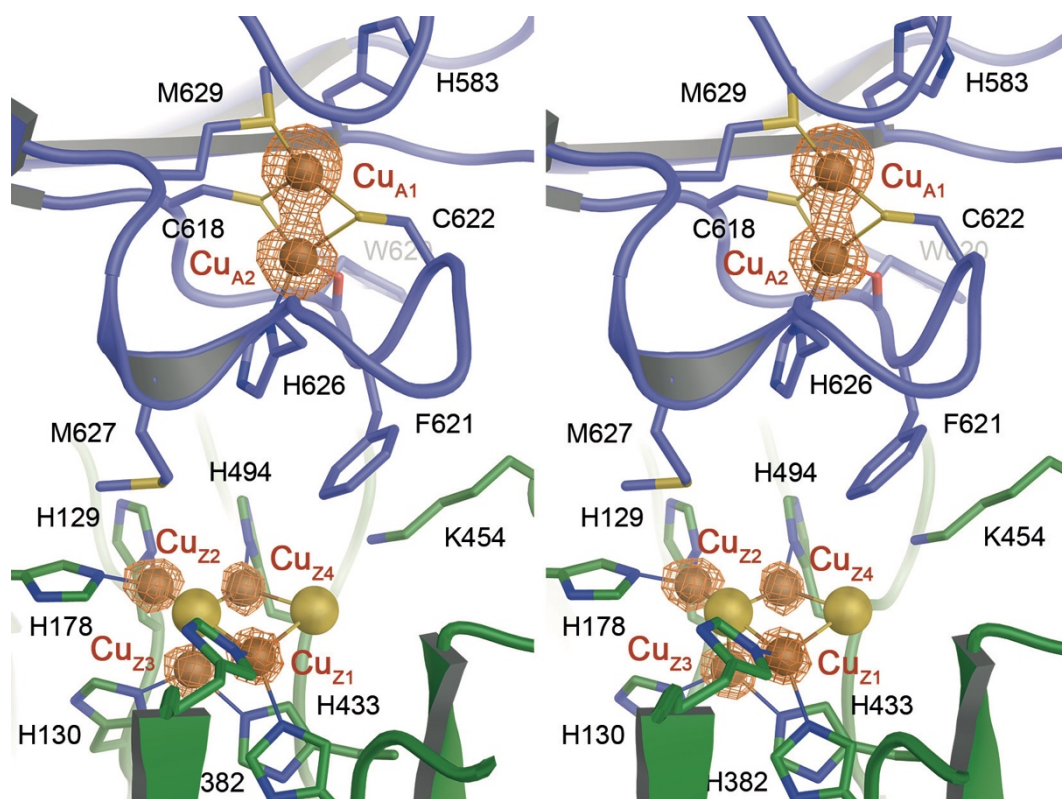

**Figure S4:** Anomalous difference Fourier electron density maps. The stereo image, analogous to Fig. 3e, shows an electron density map with anomalous differences as Fourier coefficients contoured at the  $3.5 \sigma$  level. Residue H583 was found not to coordinate  $\text{Cu}_{\text{A1}}$  in any of the four monomers in the asymmetric unit. The contour map clearly indicates that while the metal sites in  $\text{Cu}_{\text{A}}$  were fully occupied, the  $\text{Cu}_{\text{Z}}$  centers showed a partial occupancy of approximately  $q = 0.5$ .

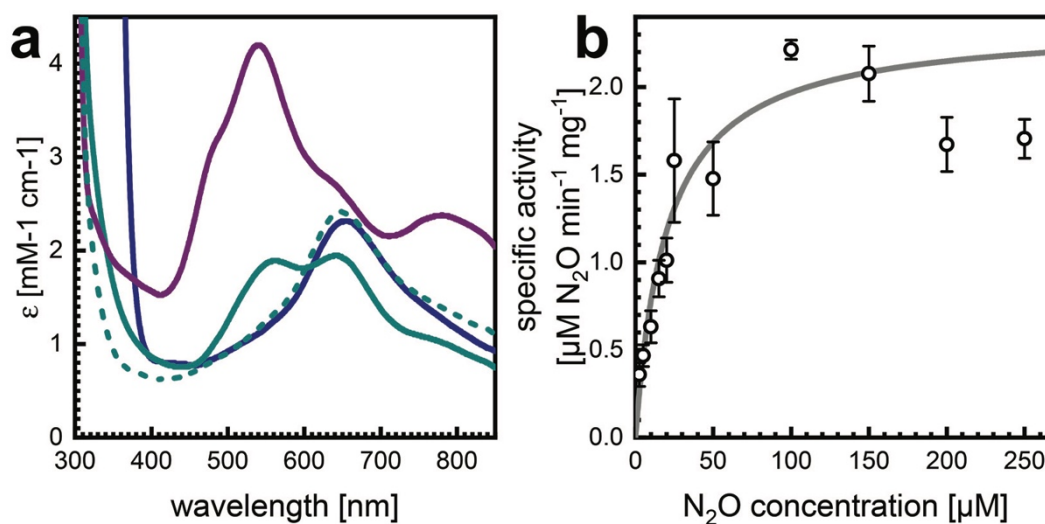

**Figure S5:** The role of NosR and ApbE in the maturation of *PsNosZ*. rNosZ was produced without co-expression of *PsNosR* and *PsApbE* (II in Table 1). **A)** Electron excitation spectra of rN<sub>2</sub>OR. The protein was isolated in the blue form, with a single maximum at 650 nm (dashed). Oxidation with potassium ferricyanide turned the sample purple, yielding a form I spectrum with maxima at 538 nm and 780 nm (purple). Selective reduction of Cu<sub>4</sub>A by sodium ascorbate resulted in maxima at 562 nm and 640 nm (cyan), and further reduction by sodium dithionite re-formed the single peak at 650 nm (blue). **C)** Specific activity of rN<sub>2</sub>OR (II) towards N<sub>2</sub>O using reduced benzyl viologen as an electron donor.  $V_{\max}$  and  $K_M$  were determined to  $2.08 \pm 0.10 \mu\text{M N}_2\text{O min}^{-1} \text{mg}^{-1}$  and  $16.18 \pm 3.01 \mu\text{M}$ , respectively, using a hyperbolic fit function according to the Michaelis-Menten equation.

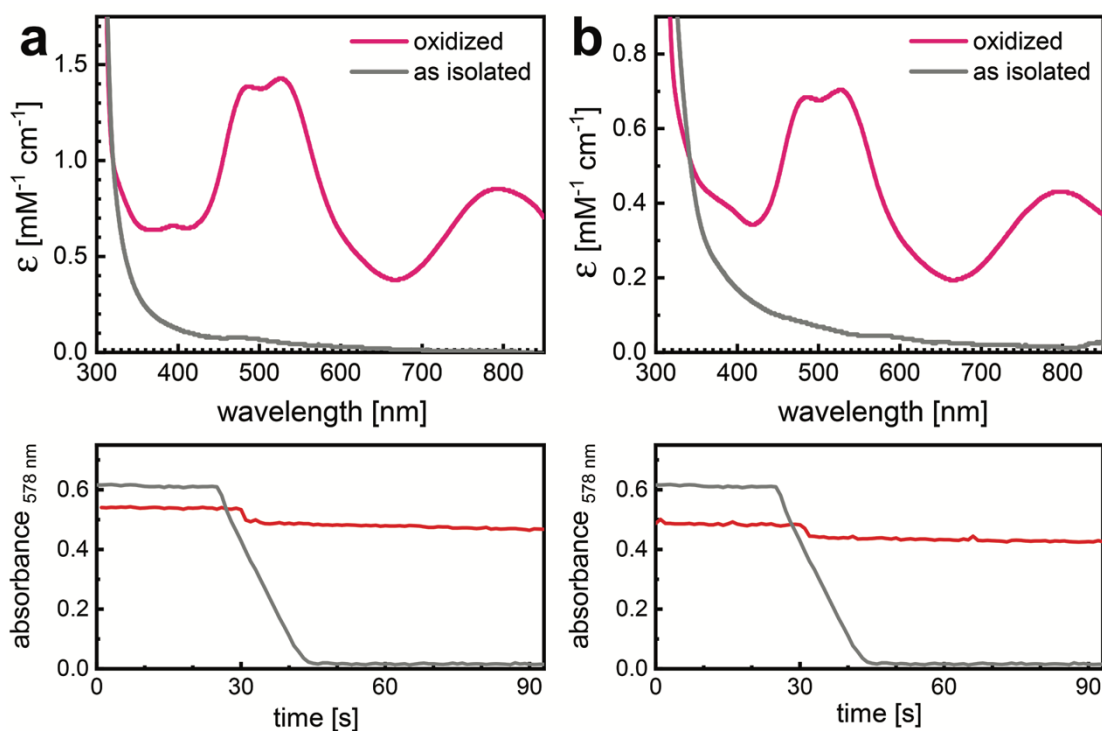

**Figure S6:** The role of NosDFY in the assembly of Cu<sub>Z</sub>. **A)** rN<sub>2</sub>OR could be produced without the co-expression of *PsNosRDFY* and *PsApbE* (III in Table 1). As shown by electron excitation spectroscopy (above), the protein was colorless as isolated (grey). It turned pink upon oxidation by potassium ferricyanide, showing the spectral features of Cu<sub>A</sub>, with maxima at 485 nm, 525 nm and 795 nm (pink). An activity assay (below) for *PsNosZ* (III) using reduced benzyl viologen as electron donor and N<sub>2</sub>O as a substrate showed no activity (pink). The grey curve represents a positive control using sample *PsNosZ* (II). **B)** If rN<sub>2</sub>OR was instead produced under co-expression of inactive *PsNosDFY* (E154Q<sup>F</sup>, IV in Table 1), the sample again only showed the spectral features of the Cu<sub>A</sub> site (above, pink), albeit with a reduced occupancy, but not of Cu<sub>Z</sub>. The corresponding activity assay for *PsNosZ* (IV) on N<sub>2</sub>O (below) again showed no activity of the sample (pink). The grey curve is the same positive control as in (A).

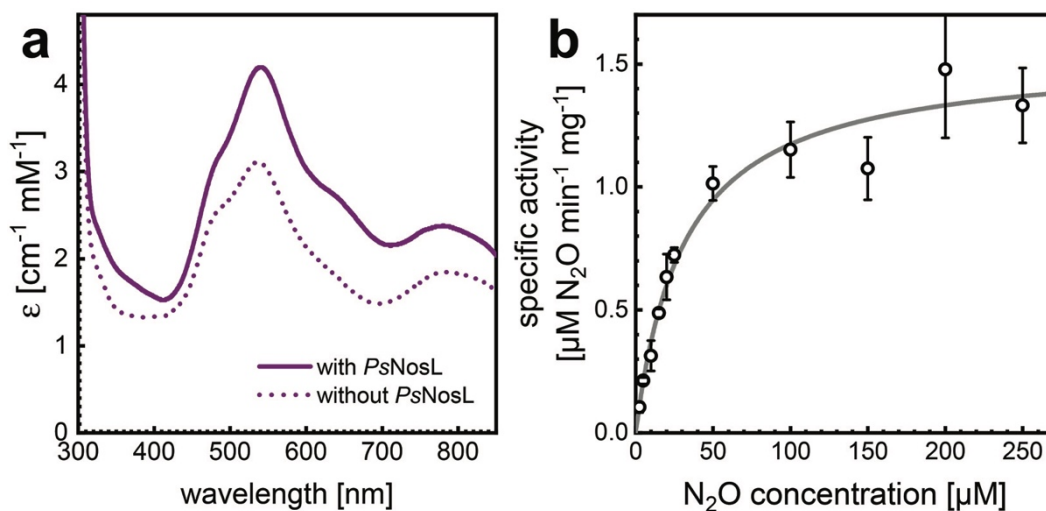

**Figure S7:** Role of *PsNosL* in the copper site assembly of *PsNosZ*. rN<sub>2</sub>OR was produced with and without co-expression of *PsNosRL* and *PsApbE* (V in Table 1). **A)** *PsNosZ* (V) was isolated in the blue form (data not shown) and yielded a purple form I spectrum upon oxidation with potassium ferricyanide, with maxima at 538 nm and 785 nm (dotted). While the copper content was reduced in this preparation, the maturation of Cu<sub>2</sub> was still possible. **B)** Specific activity of *PsNosZ* (V) with N<sub>2</sub>O as a substrate and reduced benzyl viologen as electron donor. The protein was catalytically active, albeit with reduced  $v_{\max}$  of  $1.51 \pm 0.06 \mu\text{M N}_2\text{O min}^{-1} \text{mg}^{-1}$  and a doubled  $K_M$  of  $29.78 \pm 4.21 \mu\text{M}$  with respect to *PsN<sub>2</sub>OR* (II) (Figure S3).



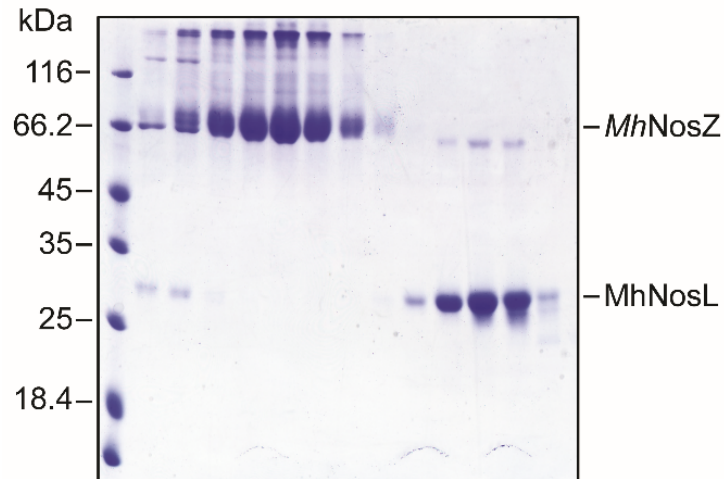

**Figure S8:** SDS-PAGE analysis of recombinant *MhNosZ* and *MhNosL*. Both *MhNosZ* and *MhNosL* were Strep-tagged at the C-terminus and separated by size-exclusion chromatography (Superdex 200, GE Healthcare after affinity chromatography). The molecular masses of *MhNosZ* and *MhNosL* are 70.3 kDa and 22.7 kDa, respectively. Although  $\text{Cu}_A$  maturation did not occur, both proteins were produced in soluble form at good yields.

**Table S1:** Bacterial strains used in this study.

| <b>Strains</b>                      | <b>Genotypes</b>                                                                                                                    | <b>Sources</b> |
|-------------------------------------|-------------------------------------------------------------------------------------------------------------------------------------|----------------|
| <b><i>E. coli</i></b>               |                                                                                                                                     |                |
| XL1-Blue                            | endA1 gyrA96(nalR) thi-1 recA1 relA1 lac glnV44<br>F' [ ::Tn10 proAB+ lacIq Δ(lacZ)M15]<br>hsdR17(rK- mK+)                          | Stratagene     |
| XL10-Gold                           | endA1 glnV44 recA1 thi-1 gyrA96 relA1 lac Hte<br>Δ(mcrA)183 Δ(mcrCB-hsdSMR-mrr)173 tetR F'<br>[proAB lacIqZΔM15 Tn10(TetR Amy CmR)] | Stratagene     |
| C43(DE3)                            | F– ompT gal dcm hsdSB(rB- mB-)(DE3)                                                                                                 | Lucigen        |
| <b><i>Denitrifying bacteria</i></b> |                                                                                                                                     |                |
| MK418 (pPR6hE)                      | <i>Pseudomonas stutzeri</i> ZoBell mutant MK418 harbor-<br>ing plasmid pPR6hE.                                                      | (1)            |
| DSM-8798                            | <i>Marinobacter hydrocarbonoclasticus</i> strain                                                                                    | DSMZ           |

**Table S2:** Plasmids used in this study.

| Plasmid             | Relevant characteristics                                                                                           | Sources   |
|---------------------|--------------------------------------------------------------------------------------------------------------------|-----------|
| pET-22b(+)          | Expression vector, T7 promoter, Amp <sup>R</sup> .                                                                 | Novagen   |
| pET-30a(+)          | Expression vector, T7 promoter, Kan <sup>R</sup> .                                                                 | Novagen   |
| pPR6hE              | pUCP22 based plasmid containing <i>nosRZDFYltatE</i> gene cluster of <i>P. stutzeri</i> ZoBell, Amp <sup>R</sup> . | (1)       |
| pPR6hE-Zs           | Insertion of StrepTag into C-terminus of <i>nosZ</i> .                                                             | This work |
| pET30-nos(P)        | <i>nosRZDFYltatE</i> gene cluster of <i>P. stutzeri</i> in pET30a(+).                                              | This work |
| pET22-nosZL(P)      | <i>nosZLtatE</i> genes of <i>P. stutzeri</i> in pET22b(+).                                                         | This work |
| pET22-nosZ(P)       | <i>nosZtatE</i> genes of <i>P. stutzeri</i> in pET22b(+).                                                          | This work |
| pET30-nosDFYL(P)    | <i>nosDFYltatE</i> gene cluster of <i>P. stutzeri</i> in pET30a(+)                                                 | This work |
| pLZPs2              | <i>nosDFYtatE</i> genes of <i>P. stutzeri</i> in pET30a(+).                                                        | This work |
| pET30-nosDF*Y(P)    | <i>nosDFYtatE</i> genes of <i>P. stutzeri</i> in pET30a(+), NosF with mutation of E154Q.                           | This work |
| pET22b-apbE(P)      | <i>apbE</i> of <i>Pseudomonas stutzeri</i> ZoBell in pET-22b(+)                                                    | (2)       |
| pET22b-apbE(P)attP  | pET22b-apbE(P) with <i>attP</i> (ϕBT1) site.                                                                       | This work |
| pET30-nosRZL(P)     | <i>nosRZLtatE</i> genes of <i>P. stutzeri</i> in pET30a(+)                                                         |           |
| pET30-nosRZL(P)attB | pET30-nosRZL(P) with <i>attB</i> (ϕBT1) site.                                                                      | This work |
| pLZPs1              | <i>nosRZLtatE</i> and <i>apbE</i> genes of <i>P. stutzeri</i> in pET22b(+)                                         | This work |
| pET21a-nosZ(syn)    | Codon optimized <i>nosZ</i> genes of <i>Shewanella denitrificans</i> in pET21a(+), Strep-Tagged.                   | (3)       |
| pET21a-nosR(syn)    | Codon optimized <i>nosR</i> genes of <i>S. denitrificans</i> in pET21a(+), order from LifeTechnologies.            | This work |
| pET30S-nosR(syn)    | Codon optimized <i>nosR</i> genes of <i>S. denitrificans</i> in modified pET30(+), Strep-Tagged.                   | This work |
| pET21a-nosL(syn)    | Codon optimized <i>nosL</i> genes of <i>S. denitrificans</i> in pET21a, order from LifeTechnologies.               | This work |
| pET22b-nosL(syn)    | Codon optimized <i>nosL</i> genes of <i>S. denitrificans</i> in pET22b(+), C-terminal 6×His-Tagged.                | This work |
| pET30S-nosL(syn)    | Codon optimized <i>nosL</i> genes of <i>S. denitrificans</i> in pET30a(+), Strep-Tagged.                           | This work |
| pET22-nosZ(M)       | <i>nosZ</i> gene of <i>Marinobacter hydrocarbonoclasticus</i> in pET22b(+), C-terminal 6×His-Tagged.               | This work |
| pET22S-nosZ(M)      | <i>nosZ</i> gene of <i>M. hydrocarbonoclasticus</i> in pET22b(+), Strep-Tagged.                                    | This work |
| pET22-nosL(M)       | <i>nosL</i> gene of <i>M. hydrocarbonoclasticus</i> in pET22b(+), 6×His -Tagged.                                   | This work |
| pET30S-nosL(M)      | <i>nosL</i> gene of <i>M. hydrocarbonoclasticus</i> in pET30a(+), Strep-Tagged.                                    | This work |

**Table S3:** Primers used in this study.

| <b>Primer</b> | <b>Sequence</b>                                                                       | <b>Description</b>          |
|---------------|---------------------------------------------------------------------------------------|-----------------------------|
| ZL141         | 5'-tggagccaccgcagttcgaaaaataagctgttcgagccatc-3'                                       | StrepTag for NosZ           |
| ZL142         | 5'-ttttcgaactcgggtggctccaggccggctcgaccatcatg-3'                                       |                             |
| ZL143         | 5'-tatatctccttcttaaag-3'                                                              | backbone of pET             |
| ZL144         | 5'-tgagatccggctgctaac-3'                                                              |                             |
| ZL145         | 5'-ctttaagaaggagatatacatatggcttcccgtgaaatc-3'                                         | pET30-nos(P)                |
| ZL146         | 5'-gttagcagccggatctcagctcctgcttgacgcctc-3'                                            |                             |
| ZL155         | 5'-ctttaagaaggagatatacatatgttcaaaagctcaggctac-3'                                      | pET30-nosDFYL(P)            |
| ZL161         | 5'-ggcagccatagagcgacaagattccaag-3'                                                    | pET22-nosZL(P)              |
| ZL162         | 5'-gtggtggctcagcgtcagctcctgcttgacgcctc-3'                                             |                             |
| ZL181         | 5'-tgagcagcagtggtctgaac-3'                                                            | pET22-nosZ(P)               |
| ZL182         | 5'-tcagaccactgctgctcattttcgaactgcgg-3'                                                |                             |
| ZL182b        | 5'-tcagaccactgctgctcaggtaagcggcg-3'                                                   | pET30-nosDFY(P)             |
| CM001         | 5'-gcttgctgctgctcagcagccgaccg-3'                                                      | NosF(E154Q)                 |
| CM002         | 5'-gagccccacggctggctgacgagcag-3'                                                      |                             |
| ZL153         | 5'-tgactttcatgaatcgaa-3'                                                              | pET30-nosRZL(P)             |
| ZL154         | 5'-ttcgattcatgaaagtcattttcgaactgcgggtg-3'                                             |                             |
| ZL205         | 5'-tgacgaaagtgatccagatgatccagcggattggcgaatgggac-3'                                    | pET30-nosRZL(P) <i>attB</i> |
| ZL206         | 5'-tctggatcactttcgtcaaaaacctggatatagttctctctttc-3'                                    |                             |
| ZL11          | 5'-ggcagccatagcttgaggcaggggtg-3'                                                      | pET30S-nosR(syn)            |
| Strep-R       | 5'-gtagtctgctgactcattttcgaactgcgggtggctccagctctggaagtacaagttc<br>tcgaggctggcaacatt-3' |                             |
| ZL29a         | 5'-cgatggccatggatgggtgccgataccgt-3'                                                   | pET22-nosL(syn)             |
| T7-ter        | 5'-tgctagtattgctcagcgg-3'                                                             |                             |
| ZL197         | 5'-ggcagccatagaaaaaagagatgac-3'                                                       | pET22-nosZ(M)               |
| ZL198         | 5'-gtggtgctcagggccttttcgacgagc-3'                                                     |                             |
| ZL199         | 5'-agccaccgcagttcgaaaaatgagatccggctgctaac-3'                                          | pET22S-nosZ(M)              |
| ZL200b        | 5'-ttcgaactcgggtggctccactcagggccttttcgac-3'                                           |                             |
| ZL49          | 5'-cggcagatggccatggattccggagatgaaccgag-3'                                             | pET22b-nosL(M)              |
| ZL50          | 5'-gtggtgctcgagatgggccatttcagactc-3'                                                  |                             |

**Table S4:** Data collection and refinement statistics.

| <b>Data sets</b>                    | <b>Form I</b>               | <b>Form II</b>             |
|-------------------------------------|-----------------------------|----------------------------|
| PDB ID                              | 6RL0                        | 6RKZ                       |
| Space group                         | $P 2_1$                     | $P 2_1$                    |
| Cell constants                      | a, b, c [Å]                 | 68.89, 76.79, 108.82       |
|                                     | $\alpha, \beta, \gamma$ [°] | 90.00, 93.33, 90.00        |
| Wavelength [Å]                      | 1.36999                     | 1.36998                    |
| Resolution limits [Å]               | 48.91 – 1.78 (1.81 – 1.78)  | 76.79 – 1.60 (1.79 – 1.60) |
| Completeness (%)                    | 100 (100)                   | 92.2 (71.6)                |
| Unique reflections                  | 205189                      | 97861                      |
| Multiplicity (%)                    | 13.0 (12.0)                 | 7.0 (7.2)                  |
| $R_{\text{merge}}^*$                | 0.120 (2.076)               | 0.076 (1.075)              |
| $R_{\text{p.i.m.}}$                 | 0.034 (0.619)               | 0.031 (0.428)              |
| Mean $I/\sigma(I)$                  | 15.7 (1.4)                  | 14.0 (1.5)                 |
| $CC_{1/2}$                          | 0.999 (0.492)               | 0.998 (0.641)              |
| <b>Refinement statistics</b>        |                             |                            |
| $R_{\text{work}} / R_{\text{free}}$ | 0.17 / 0.20                 | 0.15 / 0.19                |
| No. atoms                           | 19542                       | 10272                      |
| Protein                             | 18402                       | 9245                       |
| Ligand/ion                          | 136                         | 106                        |
| Water                               | 1004                        | 921                        |
| B-factor [Å <sup>2</sup> ]          |                             |                            |
| Protein                             | 28.54                       | 31.75                      |
| Ligand/ion                          | 30.10                       | 43.66                      |
| Water                               | 29.73                       | 40.99                      |
| R.m.s. deviations                   |                             |                            |
| bond lengths [Å]                    | 0.0180                      | 0.0102                     |
| bond angles [°]                     | 1.8115                      | 1.097                      |

### Supplementary references

1. Wunsch P & Zumft WG (2005) Functional domains of NosR, a novel transmembrane iron-sulfur flavoprotein necessary for nitrous oxide respiration. *J Bacteriol* 187(6):1992-2001.
2. Zhang L, Trncik C, Andrade SL, & Einsle O (2017) The flavinyl transferase ApbE of *Pseudomonas stutzeri* matures the NosR protein required for nitrous oxide reduction. *Biochim Biophys Acta* 1858(2):95-102.
3. Schneider LK & Einsle O (2016) The role of calcium in secondary structure stabilization during maturation of nitrous oxide reductase. *Biochemistry*.
